# Supplementary material for: In situsynthesis of polythiophene encapsulated 2D hexagonal boron nitride nanocomposite based electrochemical transducer for detection of 5-fluorouracil with high selectivity
Source: Royal Society of Chemistry journal article supplement (doi:10.1039/d2ra07147a), 2023-01-01
Supplement: d2ra07147a1.pdf [file d2ra07147a1.pdf]

## Supporting Information

### **In-situ Synthesis of Polythiophene Encapsulated 2D Hexagonal Boron Nitride Nanocomposite based Electrochemical Transducers for Detection of 5-Fluorouracil with High Selectivity**

Magesh Kumar Muthukumaran <sup>a</sup>, Muthukumar Govindaraj <sup>a</sup>, Bharathi Kannan Raja <sup>a</sup>,  
and J. Arockia Selvi <sup>a\*</sup>

<sup>a</sup> Department of Chemistry, SRM Institute of Science and Technology,  
Kattankulathur-603203, Tamil Nadu, India

\* Corresponding author

Email: [arockiaj@srmist.edu.in](mailto:arockiaj@srmist.edu.in) (J. Arockia Selvi)

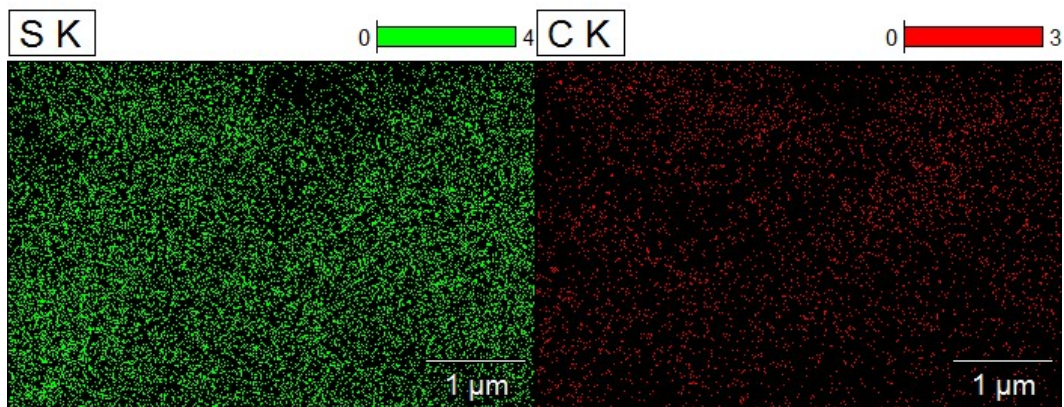

Full scale counts: 3574  
Integral Counts: 99699

Base(6)

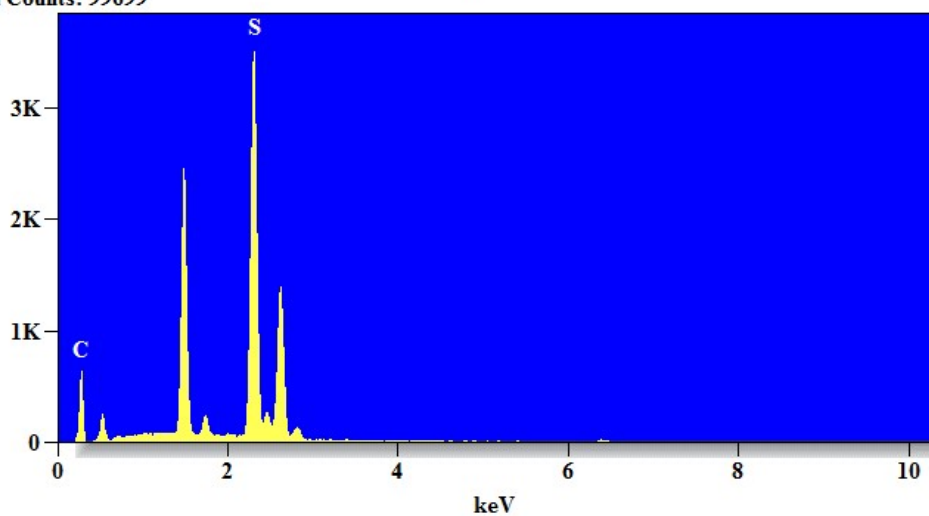

| Element | Net Counts | Weight % | Atom % | Formula |
|---------|------------|----------|--------|---------|
| C       | 3883       | 56.50    | 77.61  | C       |
| S       | 43918      | 43.50    | 22.39  | S       |
| Total   |            | 100.00   | 100.00 |         |

**Fig. S<sub>1</sub>** Elemental mapping, EDS spectrum, and elemental composition of polythiophene

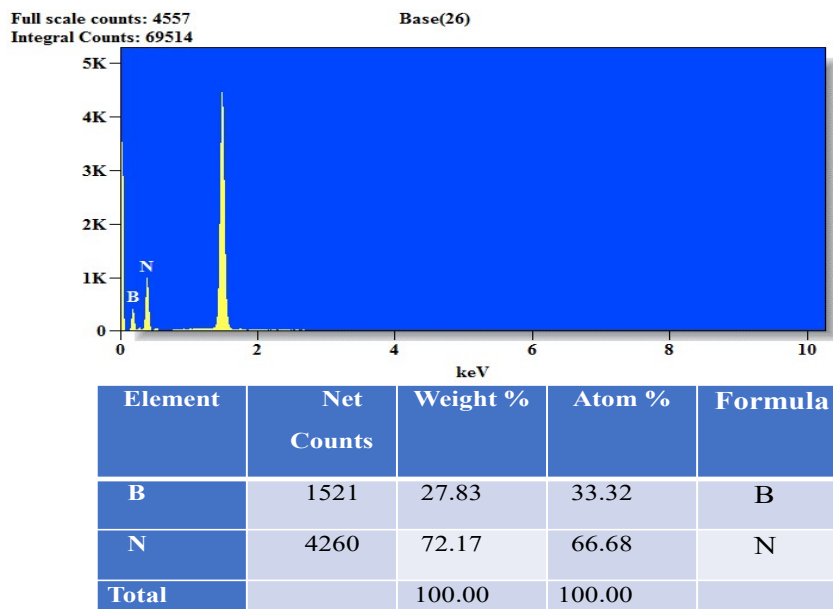

**Fig. S<sub>2</sub>** EDS spectrum, and elemental composition of hexagonal-Boron nitride nanosheet.

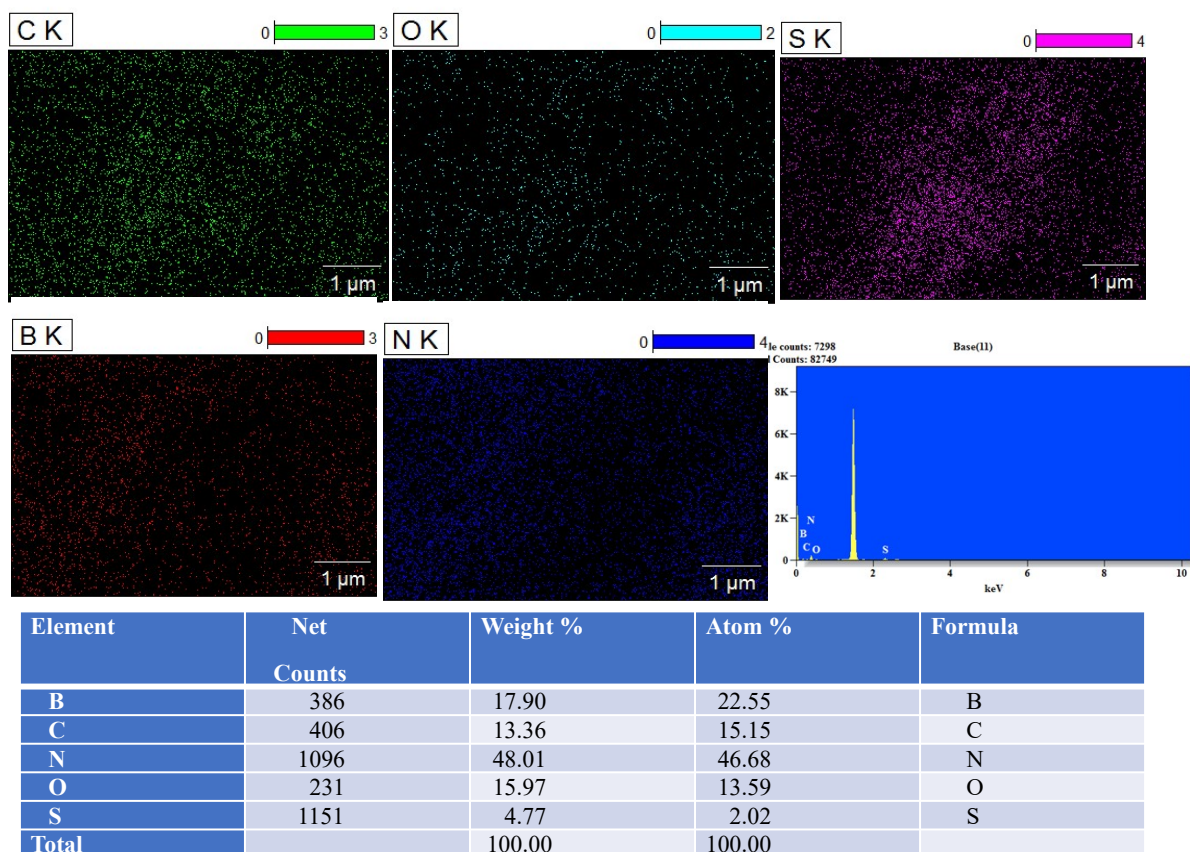

**Fig. S<sub>3</sub>** Elemental mapping, EDS spectrum, and elemental composition of PTh/h-BN composite.

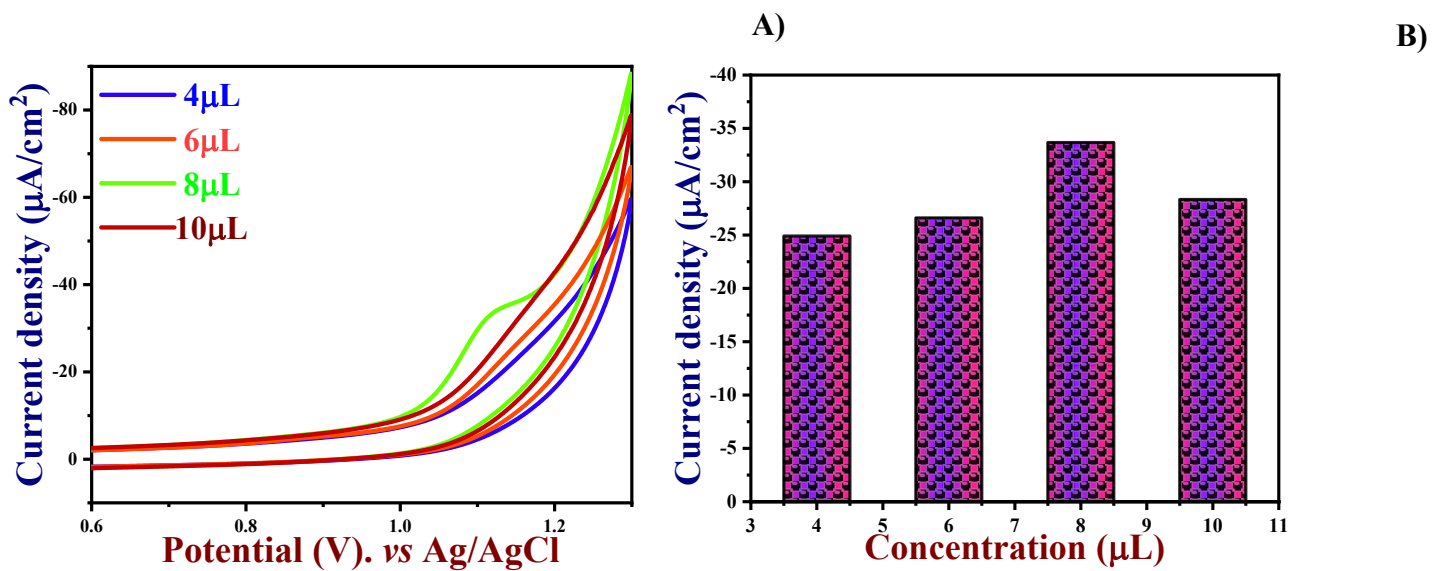

**Fig. S<sub>4</sub>(A)** CV curves of PTh/h-BN modified GCEs in presence of 0.1 M PBS (pH 7.0) containing 50 μM of 5-Fu at a scan rate of 50 mV/s in different uL of dispersion. **(B)** Histogram of current density vs concentration of different uL)

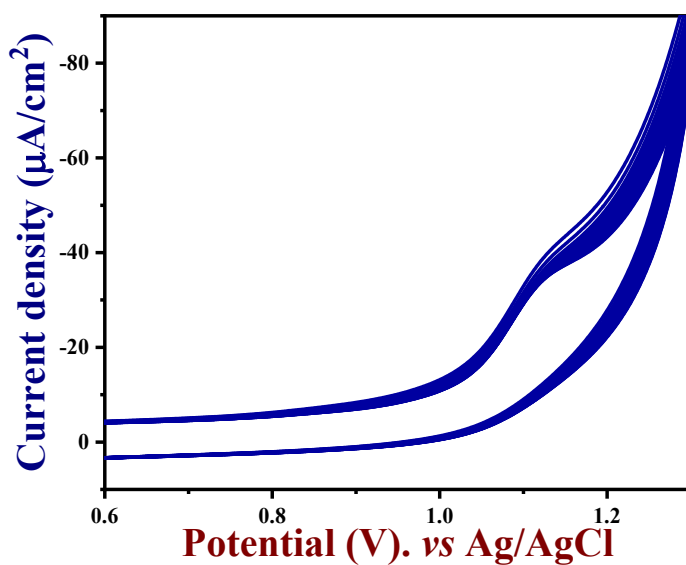

**Fig. S<sub>5</sub>** CV curves of PTh/h-BN modified GCEs in presence of 0.1 M PBS (pH =7.0) containing 50 μM of 5-Fu at a scan rate of 50 mV/s in 50 cycle segments

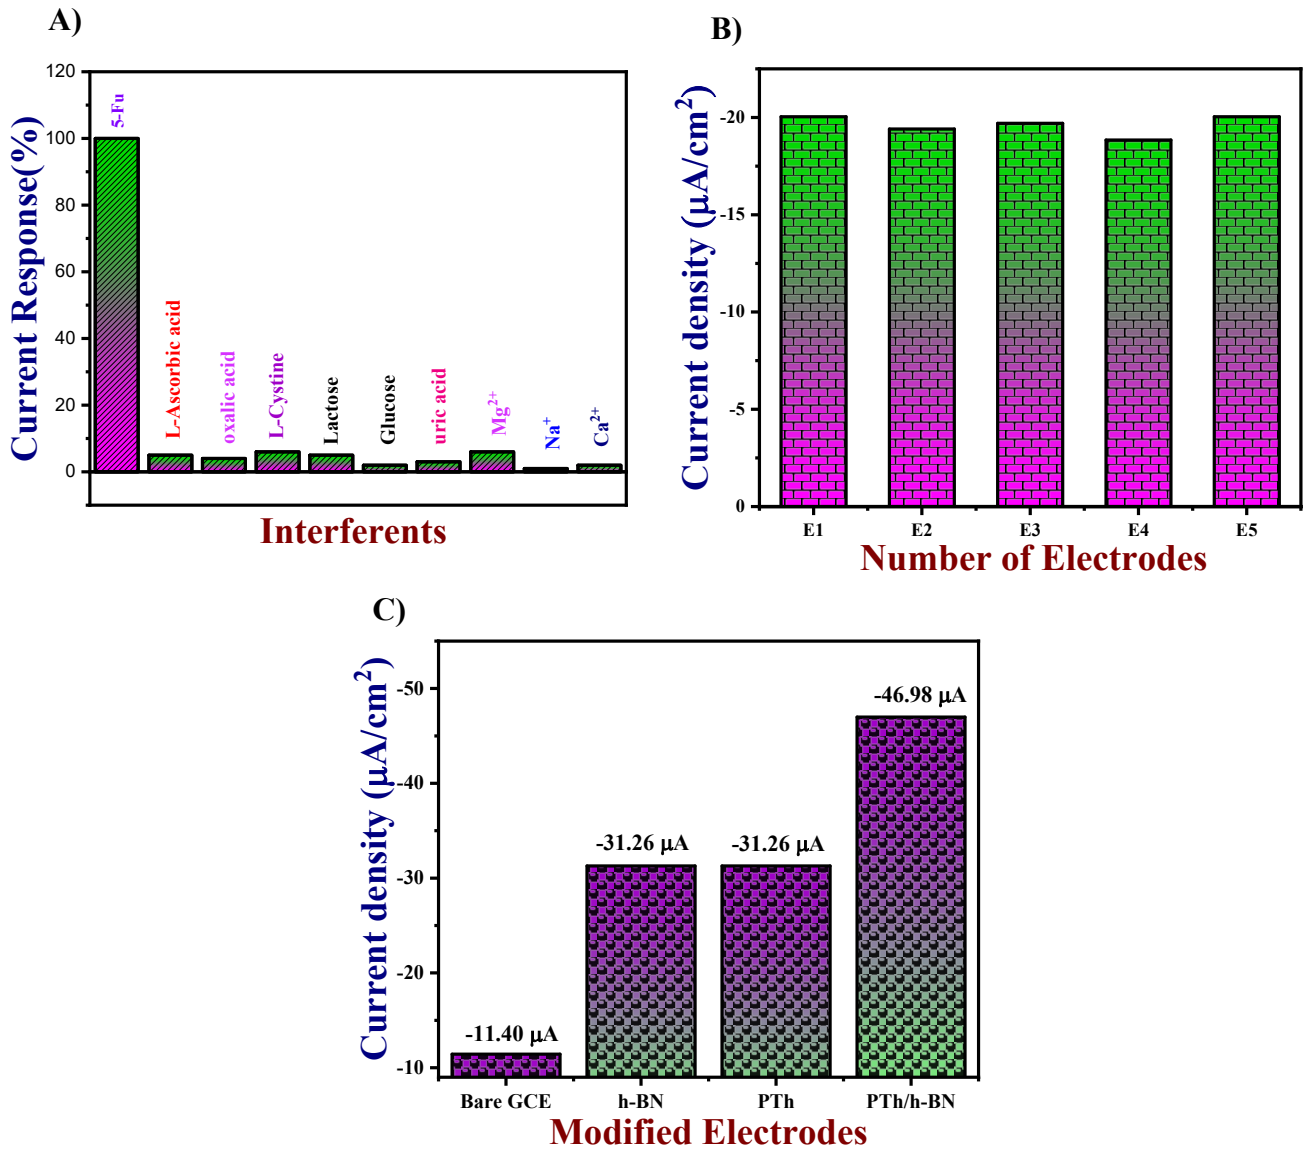

**Fig. S<sub>6</sub>** (A) Histogram of current response vs various interferent ions in the presence of target analyte (5-Fu). (B) Histogram of current density vs the number of different electrodes. (C) Histogram of current density vs the number of different modified electrodes.
